# Supplementary material for: African Mountain Thistles: Three New Genera in the Carduus-Cirsium Group
Source: Plants (Basel). 2023 Aug 28;12(17):3083. doi: 10.3390/plants12173083 (PMC10489743; doi:10.3390/plants12173083)
Supplement: Supplementary file 1 [file plants-12-03083-s001.zip › Supplementary/Table_S1.xlsx]

## Sheet: Voucher
Species	Extraction code	Accession number	Tree code names	Voucher and herbarium code
Alfredia acantholepis Kar. & Kir.	1	SAMN34240182	Alfredia acantholepis	Kazakhstan, Almatinskaya oblast, Susanna 2092 et al. (BC)
Carduus acanthoides L.	866156	SAMN34240183	Carduus acanthoides	Br. (Essex) Marks Tey, 07.14.2000, S. Pyke (BC866156)
Carduus acicularis Bertol.	WG122	SAMN34240184	Carduus acicularis	Greece, Konitsa, 07.11.1977, J.C. Van Loon G20358 (U.1109028)
Carduus adpressus C.A.Mey.	MA407	SAMN34240185	Carduus adpressus	Bulgary, Smolyan, 06.30.2004, Herrero A. 2155 (MA727448)
Carduus affinis Guss.	MA409	SAMN34240186	Carduus affinis	Italy, Abruzzo, 03.07.2002, Herrero A. 1879 (MA699749)
Carduus pycnocephalus subsp. albidus (M.Bieb.) Kazmi	MW205	SAMN34240187	Carduus pycnocephalus subsp. albidus	Cyprus, Germasogeia, 08.03.2004, A. Seregin, D. Sokoloff, M. Remizova (MW0752577)
Carduus defloratus subsp. argemone (Pourr. ex Lam.) Ces.	917718	SAMN34240188	Carduus defloratus subsp. argemone 1	Spain, Asturias, 07.20.2011, A. Bueno, I. Sanzo & M. González 308 (EXSICCATA FLORA IBEROMACARONESICA SELECTA. Centuria XVI (2011)) (BC917718)
Carduus argentatus L.	WG125	SAMN34240189	Carduus argentatus	Greece, Crete, 04.26.1955, J.L. van Soest 125 (L.3024591)
Carduus nigrescens subsp. assoi Willk.	256	SAMN34240190	Carduus nigrescens subsp. assoi	Spain, Guadalajara, 06.20.1995, P. Montserrat G.3775.87 (JACA102895)
Carduus aurosicus Vill.	WG126	SAMN34240191	Carduus aurosicus	France, Provence Alpes Côte d'Azur, 08.07.1902, A. Faure (L.3024604)
Carduus baeocephalus Webb	307	SAMN34240192	Carduus baeocephalus	Spain, Las Palmas, 04.17.2021, A. Marín Alonso, M. Salas Pascual, A. Naranjo (GC-C1)
Carduus bourgeanus Boiss. & Reut.	867375	SAMN34240193	Carduus bourgeanus	Spain, Málaga, 04.09.2006, N. Nualart & D. Pérez Prieto 500 (Plantas de Antequera y Axarquía - 2006) (BC867375)
Carduus candicans Waldst. & Kit.	MW206	SAMN34240194	Carduus candicans	Croatia (MW0794214)
Carduus carduelis (L.) Gren.	WG128	SAMN34240195	Carduus carduelis	Austria, Kärnten, 06.24.1996, R. Haveman 1542 (L.3753149)
Carduus defloratus subsp. carlinifolius (Lam.) Ces.	253	SAMN34240196	Carduus defloratus subsp. carlinifolius 1	Spain, Huesca, 08.10.1989, P. Montserrat et. al. (JACA187989)
Carduus carlinoides Gouan	GC2735	SAMN34240197	Carduus carlinoides	Spain, Barcelona, 08.01.2020, M. Galbany Casals GC-2735. (
Carduus carpetanus Boiss. & Reut.	WG129	SAMN34240198	Carduus carpetanus	Spain, Galicia, 05.31.1981, E. Valdes-Bermejo 8055 (WAG.1971371)
Carduus chrysacanthus Ten.	273	SAMN34240199	Carduus chrysacanthus	Italia, Calabria, Vogt 15626 (Berlin Botanical Garden) (BGBM Col.S.1265)
Carduus arabicus subsp. cinereus (M.Bieb.) Kazmi	262	SAMN34240200	Carduus arabicus subsp. cinereus	Ukraine, Crimea, 6.6.2001, Romo 10320 & Susanna (Romo pers. herb.).
Carduus clavulatus Link	308	SAMN34240201	Carduus clavulatus	Spain, Tenerife, 06.03.2021, L. Jay-García, Y. Arjona-Fariña, J. Patiño (35ILJ2I)
Carduus crispus L.	914343	SAMN34240202	Carduus crispus	Switzerland, Küblis, CHE 690 (BC914343)
Carduus defloratus subsp. argemone (Pourr. ex Lam.) Ces.	928511	SAMN34240203	Carduus defloratus subsp. argemone 2	Spain, Barcelona, 08.01.2020, M. Galbany Casals GC-2736. (BC928511)
Carduus defloratus L.	BC9	SAMN34240204	Carduus defloratus	Spain, Lleida, 07.12.2012,V. González & J. Nuet 1510 (HERBARI DEL CENTRE EXCURSIONISTA DE CATALUNYA) (BC928511)
Carduus defloratus subsp. carlinifolius (Lam.) Ces.	GC2736	SAMN34240205	Carduus defloratus subsp. carlinifolius 2	Spain, Girona, 08.1998, T. Garnatje & J. Luque GR-13 (BC871048)
Carduus schimperi	WG148	SAMN34240206	Carduus schimperi 1	Ethiopia, Ambo, 03.22.1966, W.J.J.O de Wilde & B.E.E. de Wilde-Duyfjes 10419 (WAG.1361880)
Carduus getulus Pomel	MA410	SAMN34240207	Carduus getulus	Tunisia, Gouvernorat de GabSs, Vogt E., Oberprieler Ch. 12960 (MA586845)
Carduus nutans subsp. granatensis (Willk.) O.Bolòs & Vig	255	SAMN34240208	Carduus nutans subsp. granatensis 2	Spain, Guadalajara, 05.26.1968 (JACA197068)
Carduus nutans subsp. granatensis (Willk.) O.Bolòs & Vig	WG131	SAMN34240209	Carduus nutans subsp. granatensis 1	Yugoslavia, Kosovo, 07.15.1977, A. Touw 20303 (L.3021753)
Carduus hamulosus subsp. hystrix (C.A.Mey.) Kazmi	901416	SAMN34240210	Carduus hamulosus subsp. hystrix	Armenia, Aragatzotn province, 06.21.2002, G. Fayvush & al. 1620 (OPTIMA ITER XI TO ARMENIA) (BC901416)
Carduus keniensis	BC41	SAMN34240211	Carduus keniensis 2	Tanzania, Monte Kilimanjaro, 08.22.2014, Calleja JAC_2014_31, (Susanna Personal Herbarium ?) (JAC2014-31)
Carduus keniensis	JAC20145	SAMN34240212	Carduus keniensis 1	Kenya, Mont Kenya, 08.12.2014, Calleja JAC_2014_5 (Susanna Personal Herbarium ?) (JAC2014-5)
Carduus leptacanthus	BR66	SAMN34240213	Carduus leptacanthus 1	Rwanda, N.-Rwanda, 02.24.1972, Van der Veken P. 9539 (Plantentuin Meise:BR0000016059375)
Carduus leptacanthus	BR67	SAMN34240214	Carduus leptacanthus 2	Congo, Parc National Albert, 08.05.1952, H. Fredericq 7857 (Plantentuin Meise:BR0000016059047)
Carduus kikuyorum	WG123	SAMN34240215	Carduus kikuyorum 4	Tanzania, Ruvuma region Kitulo, 10.18.1969, J. Prins-Lampert 576 (WAG.1744238)
Carduus leptacanthus	WG144	SAMN34240216	Carduus leptacanthus 3	Ethiopia, Kaffa, 11.19.1970, R.E. Fries 348 (WAG.1744241)
Carduus litigiosus Nocca & Balb.	WG133	SAMN34240217	Carduus litigiosus	France, Flora Gallica, 05.11.1956, Stud biol Rheno-Trai in itinere 627 (U.1108480)
Carduus lusitanicus subsp. lusitanicus	MA411	SAMN34240218	Carduus lusitanicus subsp. lusitanicus	Spain, Cádiz, 07.14.1978, J.A. Devesa, J. Rivera & B. Valdés (MA239439)
Carduus santacreui (Devesa & Talavera) Devesa	MA412	SAMN34240219	Carduus santacreui	Spain, Salamanca, 07.01.1968, Bejar. s.n. (MA718312)
Carduus macracanthus	O383	SAMN34240220	Carduus macracanthus 2	Ethiopia, Simen Mts, 11.01.2007, AFROALP II team 0506-1 (ET-0506-1)
Carduus macracanthus	O386	SAMN34240221	Carduus macracanthus 1	Ethiopia, Bale Mts, 11.15.2007, AFROALP II team 0725-2 (ET-0725-2)
Carduus macrocephalus Desf.	867683	SAMN34240222	Carduus macrocephalus	Republic of South Africa, Eastern Cape Province, 02.03.2007, A. Romo, M. Galbany, S. Arrabal & M. Koekemoer R-14451 (BC867683)
Carduus martinezii Pau	MA413	SAMN34240223	Carduus martinezii	Morocco, TO, 06.16.2008, Quintanar Sánchez A., Calvo J., Andrés S., Rico E. AQ2743 (MA782501)
Carduus millefolius	BR80	SAMN34240224	Carduus millefolius	Kenya, Fort Jerusalem, Kinangop, 7.30.1960, E. Polhill 228 (Plantentuin Meise:BR0000016059573)
Carduus myriacanthus Salzm. ex. DC.	257	SAMN34240225	Carduus myriacanthus	Spain, Cadiz, 04.27.1978, T. Luque, S. Talavera, B. Valdés (JACA)
Carduus nervosus K.Koch	BC12	SAMN34240226	Carduus nervosus	Armenia, Vayotsdzor province, 06.24.2002, G. Fayvush & al. 1330 (OPTIMA ITER XI TO ARMENIA) (BC901654)
Carduus nigrescens Vill.	941129	SAMN34240227	Carduus nigrescens	Spain, Girona, 06.24.2005, S. Pyke SBP 4929 (BC907009)
Carduus nigrescens subsp. vivariensis (Jord.) Bonnier & Layens	907009	SAMN34240228	Carduus nigrescens subsp. vivariensis	Spain, Lleida, 06.20.2013, A. Mercader & J. Vigo 1085 (BC941129)
Carduus nyassanus	BR85	SAMN34240229	Carduus nyassanus 1	Kenya, Samburu, 3.30.1995, B. Bytebier 232 (Plantentuin Meise:BR0000016059610)
Carduus nyassanus	BR87	SAMN34240230	Carduus nyassanus 3	Rwanda, N.-Rwanda, 02.19.1972, P. N.-Rwanda, O.-flank van de Muhavura 9457 (Plantentuin Meise:BR0000021711428)
Carduus nyassanus	BR98	SAMN34240231	Carduus nyassanus 2	Malawi, Zomba plateau, 11.20.1981, Chapman J.D. & Tawakali E.J. 5998 (Plantentuin Meise:BR0000016059641)
Carduus kikuyorum	BR287	SAMN34240232	Carduus kikuyorum 3	Congo, Bord marécageux d'une rivière, 11.26.1969, Lisowski S., Malaisse F. & Symoens J. 8378 (Plantentuin Meise:BR0000016059948)
Carduus kikuyorum	BR293	SAMN34240233	Carduus kikuyorum 1	Ruanda, N.-Rwanda, 02.17.1972, P. Van der Veken 9414 (Plantentuin Meise:BR0000016060111)
Carduus onopordioides Fisch. ex M.Bieb.	BC15	SAMN34240234	Carduus onopordioides	Armenia, Kotayk province, 06.19.2002, G. Fayvush & al. 1380 (OPTIMA ITER XI TO ARMENIA) (BC901144)
Carduus defloratus subsp. paui (Devesa & Talavera) O.Bolòs & Vigo	MA415	SAMN34240235	Carduus defloratus subsp. paui	Spain, Teruel, 08.01.2009, Aedo Pérez C. 16712 (MA790231)
Carduus personata (L.) Jacq.	WG134	SAMN34240236	Carduus personata	Switzerland, Meiringen, 06.24.1977, A.N.C. Ten Broek 1344 (L.3023739)
Carduus nutans subsp. platypus (Lange) Greuter	843522	SAMN34240237	Carduus nutans subsp. platypus 1	Spain, Almería, 06.20.2018, B. Díaz-Garduño, N. Montes-Moreno, N. Nualart & D. Pérez-Prieto 1710 (CAMPAÑA RECOLECCIÓN AHIM 2018) (BC843522)
Carduus nutans subsp. platypus (Lange) Greuter	WG135	SAMN34240238	Carduus nutans subsp. platypus 2	Portugal, Estremadura, 03.26.1987, J. van Kasteel 4160 (L.3762761)
Carduus rivasgodayanus Devesa & Talavera	MA416	SAMN34240239	Carduus rivasgodayanus	Spain, Murcia, 06.16.1994, A. Aparicio, M.A. Carrasco, F. Martín & M. Velayos, 7446 (MA543381)
Carduus ruwenzoriensis	O384	SAMN34240240	Carduus ruwenzoriensis 2	Uganda, Rwenzori Mts, 08.28.2008, AFROALP II team 2582-1 (UG-2582-1)
Carduus ruwenzoriensis	O385	SAMN34240241	Carduus ruwenzoriensis 1	Uganda, Rwenzori Mts, 08.28.2008, AFROALP II team 2582-2 (UG-2582-2)
Carduus schimperi	BR70	SAMN34240242	Carduus schimperi 3	Ethiopia, Road Wondo-Agere Selam, 11.17.1967, Westphal E. & Westphal-Stevels J. 2675 (Plantentuin Meise:BR0000016060616)
Carduus seminudus M. Bieb.	904076	SAMN34240243	Carduus seminudus	Armenia, Sjunik province, 04.30.2005, E. Vitek & al. 05-0444 (ARMENIA 2005) (BC904076)
Carduus schimperi	P53	SAMN34240244	Carduus schimperi 2	Ethiopia, Col de Mororo, 05.16.1970, J.L. Guillaumet 2674 (MNHN-P-P00931227)
Carduus kikuyorum	GC445	SAMN34240245	Carduus kikuyorum 2	Rwanda, Northern Province, 02.10.2022, M. Galbany-Casals, J. A. Calleja & M. Kandziora GC-2779
Carduus squarrosus DC. ex. Lowe	263	SAMN34240246	Carduus squarrosus	Portugal, Madeira, Raus 18146 (Berlin Botanical Garden 667) (BGBM Col. S.1271)
Carduus sylvarum	BR81	SAMN34240247	Carduus sylvarum 1	Kenya, Kerita forest station, 01.29.1962, B. Verdcout 3268 (Plantentuin Meise:BR0000016059542)
Carduus sylvarum	BR367	SAMN34240248	Carduus sylvarum 2	Kenya, Upper Imenti Forest, 05.28-29.1974, R.B. & A.J. Faden 74.914 (Plantentuin Meise:BR0000016059528)
Carduus tenuiflorus Curtis	910999	SAMN34240249	Carduus tenuiflorus	Morocco, Haute Ouerrha, 05.02.2003, A. Romo & I. Soriano R-10681 (BC910999)
Carduus thoermeri Weinm.	WG136	SAMN34240250	Carduus thoermeri	Finland, Nylandia, 07.23.1965, V.J. Oinonen (L.3027273)
Carduus tmoleus Boiss.	WG137	SAMN34240251	Carduus tmoleus	Greece, Katara Pass, 07.21.1994, T. Raus, M. Palm, C. Schiers 20845 (L.3027274)
Carduus uncinatus M. Bieb.	MW171	SAMN34240252	Carduus uncinatus	Russia, Zianchurinsky district, 07.18.1959, Zhudova P., Gruzdeva M. (MW0381428)
Cirsium acaule (L.) Scop.	259	SAMN34240253	Cirsium acaule	Spain, Huesca, 07.31.1987, P.Montserrat and L.Villar et. al. (JACA735387)
Cirsium adjaricum Sommier & Levier	TD3609	SAMN34240254	Cirsium adjaricum	Turkey, Rize, 09.01.2007, Dirmenci & Arabaci TD-3609
Cirsium alatum (S.G.Gmel.) Bobrov	MW214	SAMN34240255	Cirsium alatum	Iran, Azerbaijan, Mozaffarian 93894 (TARI).
Cirsium amani Post	T13	SAMN34240256	Cirsium amani	Turkey, Osmaniye, 08.21.2008, Dirmenci & Arabacı BY-16975
Cirsium amplexifolium (Nakai) Kitam.	FJ326	SAMN34240257	Cirsium amplexifolium	Japan, Honshu, 11.02.2014, Kazumi Fujikawa 14019 (MBK-0270155)
Cirsium arizonicum (A.Gray) Petr.	84	SAMN34240258	Cirsium arizonicum	U.S.A., Arizona, 06.14.2001, E Gilbert 712 (ASU)
Cirsium arvense (L.) Scop.	871128	SAMN34240259	Cirsium arvense	Austria, Niederösterreich, 07.05.1998, E. Vitek 98-928 (HERBARIUM W) (BC871128)
Cirsium aytatchii H.Duman & R.R.Mill	T35	SAMN34240260	Cirsium aytatchii	Turkey, Adana, 08.04.2016, Dirmenci & Arabaci TD-4816
Cirsium bornmuelleri Sint. ex Bornm.	MW217	SAMN34240261	Cirsium bornmuelleri	Iran, Khorassan, 08.02.1999, Mozaffarian 79721 (TARI).
Cirsium boujartii (Piller & Mitterp.) Sch.Bip. ex Janka	MW202	SAMN34240262	Cirsium boujartii	Romania (MW0794279)
Cirsium brevipapposum Tschern.	MW204	SAMN34240263	Cirsium brevipapposum	Afghanistan, 22.07.1974, Gubanov I. (MW0752592)
Cirsium buchwaldii	P55	SAMN34240264	Cirsium buchwaldii 3	Congo, Kivu, 02.18.1975, W.G. d' Arcy 7948 (MNHN-P-P0010147)
Cirsium buchwaldii	WG118	SAMN34240265	Cirsium buchwaldii 2	Malawi, N. Prov., 05.15.1976, J. Pawek 11273 (WAG.1322534)
Cirsium buergeri Miq.	277	SAMN34240266	Cirsium buergeri	Kyoto Botanical Garden 1656
Cirsium canum (L.) All.	260	SAMN34240267	Cirsium canum 2	Czech Republic, 10.26.2014 (Pilsen Botanical Garden) (HB PLZEH)
Cirsium canum (L.) All.	T51	SAMN34240268	Cirsium canum 1	Turkey, Kahramanmaraş, 08.04.2016, Dirmenci & Arabaci TD-4819
Cirsium carniolicum Scop.	WG139	SAMN34240269	Cirsium carniolicum	Slovenia, Julijske Alpe, 07.06.1953, E. Mayer (WAG.1322540)
Cirsium caucasicum (Adams) Petr.	BY16329	SAMN34240270	Cirsium caucasicum	Turkey, Ardahan, 08.17.2006, Yıldız & Dirmenci BY-16329
Cirsium cephalotes Boiss.	TD5197	SAMN34240271	Cirsium cephalotes	Turkey, Erzurum, 09.01.2018, Dirmenci & Arabaci TD-5197
Cirsium ciliatum (Murray) Moench	MW219	SAMN34240272	Cirsium ciliatum	Iran, Mazandaran, 08.25.1974, Wendelbo, Foroughi & Assadi 14067 (TARI).
Cirsium congdonii R.J.Moore & Frankton	41	SAMN34240273	Cirsium congdonii	U.S.A., California, 06.09.2010, Fraga 3468 (RSA)
Cirsium sorocephalum subsp. congestum (Fisch. & C.A.Mey. ex DC.) Yıldız, Dirmenci & Arabacı	MW195	SAMN34240274	Cirsium sorocephalum subsp. congestum	Turkmenistan, 08.26.1931, Borisova A. (MW0889871)
Cirsium vlassovianum Fisch. ex. DC.	MW163	SAMN34240275	Cirsium vlassovianum 1	Russia, Yu. Sikhote-Alin. 08.30.1944, Zhudova P., Pokrovskaya 3354 (MW0150743)
Cirsium creticum (Lam.) d'Urv.	TD5233	SAMN34240276	Cirsium creticum	Turkey, Konya, 09.12.2018, Dirmenci & Yıldız TD-5233
Cirsium davisianum Kit Tan & Sorger	TD4900	SAMN34240277	Cirsium davisianum	Turkey,Erzurum, 08.09.2017, Dirmenci & Arabaci TD-4900
Cirsium decussatum Janka	MW168	SAMN34240278	Cirsium decussatum	Russia, Moscow region, 08.14.1957, G. Zagorodnyaya, N. Kurchenko, Ya. Starobogatov, V. Tikhomirov, N. Shvedchikova 2014 (1) (MW0409871)
Cirsium dender	BR94	SAMN34240279	Cirsium dender 3	Ethiopia,Illubator Region, 11.15.1995, Friis I., Bidgood S., Host P., Desissa Dessalegn & Kebede Shigulte 7161 (Plantentuin Meise:BR0000016273009)
Cirsium dender	WG320	SAMN34240280	Cirsium dender 1	Ethiopia, Kefa, 12.03.1972, I. Friis, Getachew Aweke, F. Rasmussen, K.B. Vollesen 1444 (WAG00005419
Cirsium dender	WG321	SAMN34240281	Cirsium dender 2	Ethiopia, Gamu-Gofa, 12.25.1997, I. Friis, G.S. Biggood, Melaku Wondafrash, Gashaw Gibre-Hiwot 8788 (WAG.1322547)
Cirsium dissectum (L.) Hill	WG141	SAMN34240282	Cirsium dissectum	Netherlands, Neerlandica, 07.10.1972, G. Zijlstra 72150 (U.1114824)
Cirsium domonii Kadota	FJ318	SAMN34240283	Cirsium domonii	Japan, Honshu, 10.30.2008, Takeo Kuramata s.n. (MBK-0304890)
Cirsium echinus (M.Bieb) Hand.-Mazz.	900271	SAMN34240284	Cirsium echinus	Armenia, Tavush province, 06.13.2002, G. Fayvush & al. 1910 (OPTIMA ITER XI TO ARMENIA) (BC900271)
Cirsium edule Nutt.	72	SAMN34240285	Cirsium edule	U.S.A., Washington, 07.13.2012, D Knoke 2288 (WTU)
Cirsium pulchellum Wooton & Standl.	306	SAMN34240286	Cirsium pulchellum	Tokyo Metropolitan Medicinal Plants Garden 531, 2002 (JBB Col. S 834)
Cirsium ekimianum Yildiz & Dimerci	T6	SAMN34240287	Cirsium ekimianum	Turkey, 12 km from Aşkale to Bayburt, 08.09.2017, Arabaci TD-4899
Cirsium elbrusense Sommier & Levier	MW186	SAMN34240288	Cirsium elbrusense	Russia, SO ASSR, 02.09.1976, Shvedchikova N. (MW0730723)
Cirsium ellenbergii Bornm.	TD3052	SAMN34240289	Cirsium ellenbergii	Turkey, Malatya, 08.25.2017, Arabaci TA-3052
Cirsium englerianum	BR76	SAMN34240290	Cirsium englerianum 2	Ethiopia, Bonga near R.C. Mission, 12.22.1965, de Wilde W.J.J.O. & De Wilde-Duyfjes B.E.E. 9440 (Plantentuin Meise:BR0000016273047)
Cirsium englerianum	BR77	SAMN34240291	Cirsium englerianum 3	Ethiopia, Kaffa prov., 12.05.1972, Friis I., Getachew A., Rasmussen F. & Vollesen K. 1556 (Plantentuin Meise:BR0000016273023)
Cirsium englerianum	WG120	SAMN34240292	Cirsium englerianum 1	Ethiopia, Bonga, 12.22.1965, W.J.J.O de Wilde & B.E.E. de Wilde-Duyfjes 9440 (WAG.1322605)
Cirsium erytrolepis K.Koch	MW185	SAMN34240293	Cirsium erytrolepis	Russia, SO ASSR, 08.31.1976,​​ A. Amirkhanov (MW0730738)
Cirsium fanjingshanense C.Shih	PE221	SAMN34240294	Cirsium fanjingshanense	China, Guizhou Province, 08.10.2020, Tiangang Gao GTG-10999. (GTG10999)
Cirsium pyrenaicum (Jacq.) All.	WG146	SAMN34240295	Cirsium pyrenaicum	Spain, Sierra Nevada, 08.1961, N.C. Meijer Drees 0154 (WAG.1322708)
Cirsium fontinale var. campylon (H.Sharsm.) D.J.Keil & C.E.Turner	46	SAMN34240296	Cirsium fontinale var. campylon	U.S.A., California, 08.11.1998, D Keil 27922 (OBI)
Cirsium rhizocephalum C.A.Mey	BY17154	SAMN34240297	Cirsium rhizocephalum	Turkey, Ardahannorth, 08.23.2010, Yıldız & Dirmenci BY-17154
Cirsium giraudiasii Sennen & Pau	WG147	SAMN34240298	Cirsium giraudiasii	Spain, Zaragoza, 08.19.1981, J.H.A. Boerboom 81036 (WAG.1322715)
Cirsium glabrifolium (C.Winkl.) O.Fedtsch. & B.Fedtsch.	PE236	SAMN34240299	Cirsium glabrifolium	China, Xinjiang Uygur Autonomous Region, 08.28.1957, Guan Kejian 3833 (PE) (PE 00455583)
Cirsium glabrum DC.	280	SAMN34240300	Cirsium glabrum	Spain, Huesca, 10.08.1992 (JACA333092)
Cirsium gyojanum Kitam.	FJ317	SAMN34240301	Cirsium gyojanum	Japan, Shikoku, 10.25.2003, N. Inagaki, M. Matsumoto et al. FOK-062751 (MBK-0074805)
Cirsium helenioides (L.) Hill	MW169	SAMN34240302	Cirsium helenioides	Russia, East Bolshezemelskaya tundra,08.03.1983, V.V. Morozov (MW0381960)
Cirsium hesperium (Eastw.) Rydb.	32	SAMN34240303	Cirsium hesperium	U.S.A., Colorado, 07.05.2003, J Flaig 346 (RM)
Cirsium heterophyllum (L.) Hill	MW162	SAMN34240304	Cirsium heterophyllum	Russia, Tyumen region Yamalo-Nenets national district, 08.10.1964, Tagunova s.n. (MW0150643)
Cirsium heterotrichum Pančić	WG149	SAMN34240305	Cirsium heterotrichum	Bulgaria, Sofia, 07.15.1955, N. Vihodcevsky (L.3696652)
Cirsium arvense var. vestitum Wimm. & Grab.	902290	SAMN34240306	Cirsium arvense var. vestitum	Armenia, Vayotsdzor province, 06.27.2002, G. Fayvush & al. 1540 (OPTIMA ITER XI TO ARMENIA) (BC902290)
Cirsium pubigerum var. spinosum Petr.	T59	SAMN34240307	Cirsium pubigerum var. spinosum	Turkey, Hakkari, 08.03.2018, Dirmenci & Yıldız TD-5134
Cirsium ishizuchiense (Kitam.) Kadota	FJ319	SAMN34240308	Cirsium ishizuchiense	Japan, Shikoku, 09.23.2004, A. Sakamoto and S. Kobayashi FOK-068791 (MBK-0093446)
Cirsium karduchorum Petr.	TD3579	SAMN34240309	Cirsium karduchorum	Turkey, Hakkari, 09.05.2007, Dirmenci TD-3579
Cirsium leo Nakai & Kitag.	PE231	SAMN34240310	Cirsium leo	China, Henan Province, 09.06.1983, Plant Resource Expedition Team L0427 (PE) (PE 00456166 )
Cirsium libanoticum subsp. libanoticum DC.	T76	SAMN34240311	Cirsium libanoticum subsp. libanoticum	Turkey, Konya, 13.09.2018, Dirmenci & Yıldız TD-5242
Cirsium ligulare Boiss.	TD4945	SAMN34240312	Cirsium ligulare	Turkey, Bursa, 09.15.2017, Dirmenci TD-4945
Cirsium maackii Maxim.	MW159	SAMN34240313	Cirsium maackii	Russia, Primorskiy territory, 04.07.1991, S.Kharkevich, T.Buch (MW0150586)
Cirsium microspicatum Nakai	278	SAMN34240314	Cirsium microspicatum	Tokyo Metropolitan Medicinal Plants Garden s.n., 2002 (TOKMM Cod.S 1906)
Cirsium mohavense Davidson & Moxley	43	SAMN34240315	Cirsium mohavense	U.S.A., California, 07.30.2014, S DeGroot 7219 (RSA)
Cirsium neomexicanum A.Gray	10	SAMN34240316	Cirsium neomexicanum	U.S.A., Colorado, 06.02.2011, L Brummer 3594 (RM)
Cirsium nerimaniae Yildiz, Dimerci & Arabaci	TD4935	SAMN34240317	Cirsium nerimaniae	Turkey, Çanakkale, 09.05.2017, Dirmenci TD-4935
Cirsium nipponicum Makino	276	SAMN34240318	Cirsium nipponicum	Tokyo Metropolitan Medicinal Plants Garden s.n., 2002 (TOKMM Cod.S 1905)
Cirsium oblongifolium K.Koch	MW181	SAMN34240319	Cirsium oblongifolium	Russia, North Ossetian ASSR, 10.08.1976, Amirkhanov A. M. (MW0730810)
Cirsium obvallatum M. Bieb.	T40	SAMN34240320	Cirsium obvallatum	Turkey, Ardahan, 08.07.2017, Dirmenci & Arabaci TD-4856
Cirsium occidentale var. candidissimum J.F.Macbr.	78	SAMN34240321	Cirsium occidentale var. candidissimum	U.S.A., Nevada, 06.25.2011, A Tiehm 16386 (RENO)
Cirsium odontolepis Boiss. ex. DC.	251	SAMN34240322	Cirsium odontolepis	Spain, Huesca, 07.31.1987. G. Montserrat G.3774.87 (JACA735287)
Cirsium osseticum Petr.	TD4848	SAMN34240323	Cirsium osseticum	Turkey, Rize, 08.07.2017, Dirmenci & Arabacı TD-4848
Cirsium palustre (L.) Scop.	909722	SAMN34240324	Cirsium palustre	Spain, Girona, 08.27.2011, S. Pyke SBP 6469 (BC909722)
Cirsium pannonicum (L.f.) Link	878461	SAMN34240325	Cirsium pannonicum	Austria, Burgenland, 06.18.2007, T. Barta 117 (Herbar Thomas Barta) (BC878461)
Cirsium peckii L.F.Hend.	130	SAMN34240326	Cirsium peckii	U.S.A., Oregon, 07.20.2007, Y Yuan 07-19 (WTU)
Cirsium pendulum Fisch. ex. DC.	MW157	SAMN34240327	Cirsium pendulum	Russia, Trans-Baikal Territory, 07.22.2011, N.S. Gamova, S.V. Dudov, No. 11_0183 (MW0150574)
Cirsium peshmenianum Yildiz, Arabaci & Dirmenci	TD5108	SAMN34240328	Cirsium peshmenianum	Turkey, Van, 08.01.2018, Dirmenci TD-5108
Cirsium pyramidale Bornm.	MW218	SAMN34240329	Cirsium pyramidale	Iran, Yazd, 06.22.1975, Fouroughi & Assadi 18006 (TARI).
Cirsium sairamense O.Fedtsch. & B.Fedtsch	L04	SAMN34240330	Cirsium sairamense	Tadjikistan, Maijora, Susanna 2468 (BC).
Cirsium schimperi	BR69	SAMN34240331	Cirsium schimperi 1	Ethiopia, Addis Ababa, 10.16.1965, de Wilde W.J.J.O. & De Wilde-Duyfjes B.E.E. 8280 (Plantentuin Meise:BR0000016273092)
Cirsium schimperi	BR78	SAMN34240332	Cirsium schimperi 3	Etiopia, Bale Prov., 07.24.1970, J.J.F.E. Wilde 6805 (Plantentuin Meise:BR0000016273061)
Cirsium buchwaldii	WG119	SAMN34240333	Cirsium buchwaldii 1	Tanzania, Iringa, 02.10.1969, J. Prins-Lampert 166 (WAG.1534454)
Cirsium schimperi	WG653	SAMN34240334	Cirsium schimperi 2	Ethiopia, Gojam, 09.13.2004, I. Friis, G.S. Bidgood, Assefa Hailu, Berhanu Yitbarek 11553 (WAG.1534438)
Cirsium komarovii subsp. schischkinii (Serg.) O.S.Zhirova	MW155	SAMN34240335	Cirsium komarovii subsp. schischkinii	Russia, Tuva, 07.12.1988, Shaulo D., Tyrtyk-Ool A., Bazyr V. (MW0150524)
Cirsium serratuloides (L.) Hill	MW154	SAMN34240336	Cirsium serratuloides	Republic of Buryatia, Mukhorshibirsky district. Abramova L., Volkova P., Zakharchenko,D., Borisova P., 27-7-2013. (MW0150495)
Cirsium serrulatum (M.Bieb) Fisch.	MW167	SAMN34240337	Cirsium serrulatum	Russia, Belgorod region, 07.08.1995, Tikhomirov V. N., Khoroshavina A. S., Zolkin S.Yu (MW0409966)
Cirsium sieversii (Fisch. & C.A.Mey) Petr.	MW200	SAMN34240338	Cirsium sieversii	Kazakhstan, 07.19.1961, Barabanov Е. (MW0889991)
Cirsium simplex C.A.Mey.	MW179	SAMN34240339	Cirsium simplex	Russia, Kavk. State, Reserve. 07.14.1941, Smirnov P. (MW0730942)
Cirsium sintenisii Freyn	T3	SAMN34240340	Cirsium sintenisii	Turkey, Antalya, 09.13.2018, TD-5237
Cirsium sorocephalum Fisch. & C.A.Mey.	16906	SAMN34240341	Cirsium sorocephalum	Turkey, around Zernek Dam, 08.14.2008, Yıldız & Dirmenci BY-16906
Cirsium sosnowskyi Kharadze	MW178	SAMN34240342	Cirsium sosnowskyi	Russia, North Ossetia, 19.08.1986, Komzha A.L., Alipova O.D., Efimova N.V., Masneva O.A. (MW0730971)
Cirsium steirolepis Petr.	T9	SAMN34240343	Cirsium steirolepis	Turkey, Çanakkale, 08.19.2018, Dirmenci TD-5169
Cirsium straminispinum	BR583	SAMN34240344	Cirsium straminispinum	Ethiopia, Schimper s.nBR0000016273115)
Cirsium strigosum (M.Bieb) M.Bieb.	MW220	SAMN34240345	Cirsium strigosum	Iran, Khorassan, 08.12.2004, Mozaffarian 87075 (TARI).
Cirsium shihianum Greuter	PE298	SAMN34240346	Cirsium shihianum	China, Xinjiang Uygur Autonomous Region, 1974, Lin Yourun 74-1237 (PE) (PE 00457341)
Cirsium tioganum (Congdon) Petr.	21	SAMN34240347	Cirsium tioganum	U.S.A., Colorado, 07.23.2016, J Ackerfield 16-102 (CS)
Cirsium tuberosum (L) All.	WG153	SAMN34240348	Cirsium tuberosum	France, Alsace, 06.06.1974, A.S. Troelstra 512 (L.3758649)
Cirsium turkestanicum Petr.	MW211	SAMN34240349	Cirsium turkestanicum	Iran, Khorassan, 08.12.2004, Mozaffarian 87074 (TARI).
Cirsium vlassovianum Fisch. ex. DC.	MW191	SAMN34240350	Cirsium vlassovianum 2	Mongolia, Western spurs of Bolshaya Khingan, 08.08.1991, A. Gubanov, Sh. Dariimaa 61152 (MW0194150)
Cirsium vulgare (Savi) Ten.	15	SAMN34240351	Cirsium vulgare 3	U.S.A., Wyoming, 08.07.2016, J Ackerfield 16-112 (CS)
Cirsium vulgare (Savi) Ten.	BC35	SAMN34240352	Cirsium vulgare 2	Spain, Barcelona, 05.26.2017, T. Garnatje GR524 (Projecte Mil Flors) (BC971454)
Cirsium vulgare (Savi) Ten.	GC2738	SAMN34240353	Cirsium vulgare 1	Spain, Girona, 08.15.2020, M. Galbany Casals GC-2738 (GC2738)
Cirsium vulgare (Savi) Ten.	GT322	SAMN34240354	Cirsium vulgare 4	Kenia, Nyanyuki, 11.29.2017, G. Talavera & E. Plana RVcoll17H041
Cirsium vulgare (Savi) Ten.	GT340	SAMN34240355	Cirsium vulgare 5	Ethiopia, Addis Ababa, 2018, M. Mencherri & T. Suchan GTcoll19P125
Cynara cardunculus L.	22	SAMN34240356	Cynara cardunculus	U.S.A., Montana, 08.11.2016, J Ackerfield 16-122 (CS)
Cynara humilis Lindl.	304	SAMN34240357	Cynara humilis	Spain, Albacete (AH20093067)
Galactites duriaei Spach	JMM8538	SAMN34240358	Galactites duriaei	Morocco, Oujda, 04.01.2004, J. Molero & J. M. Montserrat, JMM 8538 (JM. Montserrat pers. Herb.) (JMM8538)
Galactites tomentosus Moench	S24	SAMN34240359	Galactites tomentosa	Spain, Barcelona, 06.08.2017, Susanna s. n. (BC)
Lamyropsis cynaroides (Lam.) Dittrich	301	SAMN34240360	Lamyropsis cynaroides	Turkey, Antalya, 07.31.2002, Susanna 2267 & Uysal (Susanna Personal Herbarium)
Lamyropsis microcephala (Moris) Dittrich & Greuter	302	SAMN34240361	Lamyropsis microcephala	Italy, Sardinia, 08.13.1972, Silvana Diana & Bruno Corrias (BC13081972)
Notobasis syriaca (L.) Cass.	S1844	SAMN34240362	Notobasis syriaca	Egypt, Alexandria, Susanna 1844 & Vilatersana (BC) (S1844)
Olgaea petri-primi B.A.Sharipova	1	SAMN34240363	Olgaea petri-primi	Tajikistan, Selandi, Susanna 2539 et al. (BC).
Onopordum nervosum Boiss.	S29	SAMN34240364	Onopordum nervosum	Cultivated at the Dijon Botanical Garden
Picnomon acarna (L.) Cass.	BC62	SAMN34240365	Picnomon acarna	Spain, Soria, 10.03.2020, Susanna & Garcia-Jacas (Susanna Personal Herbarium)
Ptilostemon diacanthus (Labill.) Greuter	S37	SAMN34240366	Ptilostemon diacanthus	Turkey, Adana, Susanna 2313 et al. (BC)
Ptilostemon gnaphaloides (Cirillo) Soják	303	SAMN34240367	Ptilostemon gnaphaloides	Italy, Calabria, Carretero & Vilatersana 254 (BC)
Silybum eburneum Coss. & Durieu	BC38	SAMN34240368	Silybum eburneum	Spain, Zaragoza, 05.28.2006, S. Pyke 5094 (BC) (Pyke)
Silybum marianum (L.) Gaertn.	MW208	SAMN34240369	Silybum marianum	Spain, Barcelona, 02.20.2021, Garcia Jacas & Susanna s.n.
Syreitschikovia tenuifolia (Bong.) Pavlov	S43	SAMN34240370	Syreitschikovia tenuifolia	Kyrgyzstan, Seregin 2067 (FRU).
Tyrimnus leucographus (L.) Cass.	BC300	SAMN34240371	Tyrimnus leucographus	Copenhagen Botanical Garden 235 (HB Hawriensis 672)
