# Supplementary material for: African Mountain Thistles: Three New Genera in the Carduus-Cirsium Group
Source: Plants (Basel). 2023 Aug 28;12(17):3083. doi: 10.3390/plants12173083 (PMC10489743; doi:10.3390/plants12173083)
Supplement: Supplementary file 1 [file plants-12-03083-s001.zip › Supplementary/Table_S2.xlsx]

## Sheet: Hoja1
	TABLE S2, MORPHOLOGICAL RESULTS
		Afrocarduus	Afrocirsium	Nuriaea
Stem	Stemed	Acaulescent and Caulescent	Caulescent	Caulescent
	Height	< 130 cm	50-250 cm	> 200 cm
	Fistular	Yes	Yes	Yes
	Winged	Yes, continued and discontinued	No	Yes
	Spiny/inermous	Generally spiny	Spiny or inermous	Spiny
Leaves	Form	Narrowly lanceolate to oval-lanceolate or eliptic	Entire leaf to pinnatilobate	Bipinnatifid
	Decurrent	Sometimes	Yes	?
	Spiny	In margin and lobes	Lobes with spiny appendage of 5-10mm	Mucronated, short spiny
	Pilosity surface	Glabrous, lanate, septate; disperse or tomentose	Glabrescent, sometimes with applicated hairs	Disperse, more evident in the venations
	Thick septated hairs	Generally present	No	Yes
	Venation below	Reticulate or in relief	Reticulate	?
	Pilosity below	From glabrous to abundant septated hairs	long lanated hairs	White tomentum
Capitula	Solitary or clustered	Solitary and clustered	Solitary and clustered	Solitary
	Number	1-40	?	?
	Diameter	5-30mm	10-30 mm	40-50mm
	Extern phyllaries	Linear-lanceolate, without appendages	Ovate-lanceolate, fimbriated appendage	Ovate-lanceolate, sometimes reflexed
	Phyllaries margin	Entire, denticulate, scabrid, papery, fimbriate	Scarious to shortly fimbriated	Entire or long (> 3 mm) pectinated, fimbriate
	Phyllaries margin pilosity	From glabrous to very pilose	Glabrous	Foliaceous, shortly-spiny to acuminate, long rigid-spiny
	Phyllaries apex	All ending in a spine of 1-20mm	All ending in a spine of 1-3mm	All ending in a spine of > 5mm
	Phyllaries surface pilosity	Entire, denticulate, scabrid, arachnoid	Glabrous to lanated	Glabrous
	Petals	Thickened apical end of petals	Thickened apical end of petals	Thickened apical end of petals
	Corolla	White, purple-pink	Purple-pink	White, purple
Achene	Pappus lenght	Shortly denticulate, 6-55mm	Plumose, 12mm	Plumose, 25-40mm
	Form	Achenes ovate, laterally compressed, glabrous, smooth or somewhat striate, 3–9 mm long	Achenes ovate, laterally compressed, glabrous, smooth or somewhat striate	Achenes lanceolate, compressed, glabrous, smooth or somewhat striate
